# Supplementary material
Source: MDPI journal article supplement (https://www.mdpi.com/2073-4344/14/3/180)
Supplement: s1 [file s1]

Schedule S1 Comparison of the free ROL with the immobilized enzyme

| Biocatalysts             | Free ROL          | ROL@UIO-66(Adsorption) | ROL@UIO-66/Pro(Adsorption) | ROL@UIO-66/Pro(Covalent binding) |
|--------------------------|-------------------|------------------------|----------------------------|----------------------------------|
| Enzyme activity (U)      | 0.00277±0.0000289 | 0.00342±0.000495       | 0.005323±0.0001856         | 0.0208±0.000201                  |
| Specific activity (U/mg) | 0.0373±0.000389   | 0.00359± 0.00052       | 0.0102± 0.000354           | 0.0647±0.000627                  |

Schedule S2 Enzyme stability measures initial enzyme activity

| Biocatalysts                    |   | Free ROL       | ROL@UIO-66(Adsorption) | ROL@UIO-66/Pro(Adsorption) | ROL@UIO-66/Pro(Covalent binding) |
|---------------------------------|---|----------------|------------------------|----------------------------|----------------------------------|
| <b>Temperature stability</b>    |   |                |                        |                            |                                  |
| Specific activity (U/mg)        |   | 0.0265±0.00269 | 0.00244±0.000472       | 0.00823±0.00081            | 0.0631±0.00454                   |
| <b>pH stability</b>             |   |                |                        |                            |                                  |
| Specific activity (U/mg)        |   | 0.0198±0.00727 | 0.00137±0.000593       | 0.00361±0.000137           | 0.00415±0.000543                 |
| <b>Relative conversion rate</b> |   |                |                        |                            |                                  |
| Specific activity (U/mg)        | - |                | 0.00372±0.000393       | 0.0104±0.000214            | 0.0665±0.00116                   |
